# Supplementary material for: Multidisciplinarity and interdisciplinarity at work: the prenatal diagnosis
Source: publisher site journal article supplement (doi:10.1515/cclm-2013-0214), 2013-05-16
Supplement: Supplementary file 1 [file cclm-2013-0214AD.pdf]

# Supplemental data

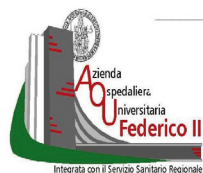

**Area Funzionale Biologia Molecolare Clinica**

**Dipartimento Assistenziale di Medicina di Laboratorio**

&

**CEINGE - Biotecnologie Avanzate**

Centro di riferimento Regione Campania per la  
Biologia Molecolare Clinica e

la Diagnostica di Malattie Congenite del Metabolismo

CENTRO DI RICERCA  
CON SISTEMA DI  
GESTIONE PER LA QUALITÀ  
CERTIFICATO DA DNV  
UNI EN ISO 9001:2008

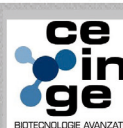

*Supplemental Table 1*

## MOLECULAR DIAGNOSIS OF GENETIC DISEASES PRENATAL DIAGNOSIS INFORMED CONSENT FORM

The undersigned \_\_\_\_\_, born in \_\_\_\_\_ on \_\_\_\_\_  
resident in \_\_\_\_\_ address \_\_\_\_\_  
partner \_\_\_\_\_, born in \_\_\_\_\_ on \_\_\_\_\_  
Telephone \_\_\_\_\_, Mobile \_\_\_\_\_  
doctor or department of origin \_\_\_\_\_

authorises Prof./Dr. \_\_\_\_\_ of the Clinical Department of Laboratory Medicine  
(DAsMeLab)–CEINGE Biotecnologie Avanzate to make DNA extraction from the following fetal tissue:

☐ Chorionic villi ☐ Amniocytes ☐ Cord blood

and to carry out the prenatal diagnosis of the following disease \_\_\_\_\_  
according to standardised protocols and reported in the international literature.

- I have been informed that if the quality and quantity of fetal DNA obtained be sufficient, analyses for the molecular diagnosis of \_\_\_\_\_ will be conducted on this material. These analyses consist of:
  - ☐ Detection of previously identified molecular alterations in the \_\_\_\_\_ gene previously found
    - ☐ In the index case ☐ In both parents ☐ In one of the parents (indicate which \_\_\_\_\_)
  - ☐ Linkage analysis
  - ☐ Presence of contamination by maternal DNA

- I have been informed that these analyses are restricted to this specific disease ( \_\_\_\_\_ ) and that they cannot give information on other diseases possibly present in the unborn child. In addition, the accuracy of the molecular analysis is based essentially on the accuracy of the clinical diagnosis carried out elsewhere, therefore the Clinical Department of Laboratory Medicine (DAsMeLab)–CEINGE Biotecnologie Avanzate cannot be held responsible for erroneous clinical diagnoses.

Signature \_\_\_\_\_

**Dipartimento Assistenziale di Medicina di Laboratorio** – Via Sergio Pansini 5 80131 Napoli – Tel. +39 081 7463184 Fax +39 081 7462404 -  
<http://www.dbbm.unina.it>

**CEINGE Biotecnologie Avanzate Scarl** – Via Gaetano Salvatore, 486 (già via Comunale Margherita) 80145 Napoli – Call Center 800116670  
Fax +39 081 3737808 – <http://www.ceinge.unina.it>

Dipartimento Assistenziale di Medicina di Laboratorio  
Azienda Ospedaliera Universitaria  
"Università degli Studi di Napoli FEDERICO II"

CEINGE Biotecnologie Avanzate S.C.a.r.l.

Informed Consent Prenatal Diagnosis continued

- In case of diagnoses based on linkage analysis, I declare that I have been informed in detail about the principle and the limits of this type of analysis. I have been informed that in this case the accuracy of the result could be 95%-99% due to events of recombination that could determine a diagnostic error.

Signature \_\_\_\_\_

- I have been informed that the molecular analysis can take from one to three weeks, starting from the day of the fetal tissue sampling. If it is necessary to prepare a cell culture with the fetal material collected, the result of the analysis may be available from three to five weeks after the sampling.
- I have been informed that should the fetal material be insufficient, I may be asked to undergo another sampling.
- I have been informed that should the fetal material be contaminated by maternal material, it will not be possible to carry out the analysis and/or I can be asked to undergo another sampling.

Signature \_\_\_\_\_

- I have been informed that, in the case of a prenatal diagnosis carried out without a previous molecular characterisation of the family, this analysis could be not informative.
- In addition I have been informed that in case of direct analysis of mutations, the analysis of fetal DNA is limited to the detection of parental mutations, therefore this analysis is based on the premise that **the family relationships declared are truthful**. Should this not be the case, the undersigned relieves DAsMeLab and its personnel from any legal or personal responsibility. I am also aware that DAsMeLab-CEINGE reserves the right to ask for a second blood sampling from the parents in order to avoid sampling errors.
- I have been informed that the type of analysis used for the detection of possible contamination by maternal DNA in the fetal tissue is based on a test that allows one to define the fetal alleles derived from the mother and father. I have been informed that this result, of which I will be made aware, is covered by professional secrecy. Other people will be informed only if I give my written consent or if required by the legal authority.
- I have been informed that in the case of dissonance between the declared and the biological paternity, the accuracy of the test may not be 100%.

Signature \_\_\_\_\_

- I have been informed that the results of the analyses will be given, in a written report and during multidisciplinary counseling, only and exclusively to me, the expectant mother requesting the analysis, and eventually in the presence of my partner, and not, for any reason, by telephone. The results of the analyses will not be given to anyone without my written permission, and my data will not be made public, according to the personal data privacy code. In addition I agree that the fetal sample that is no longer required for the diagnosis can be used anonymously for clinical research and/or epidemiology records.

Signature \_\_\_\_\_

Dipartimento Assistenziale di Medicina di Laboratorio – Via Sergio Pansini 5 80131 Napoli – Tel. +39 081 7463184 Fax +39 081 7462404 - <http://www.dbbm.unina.it>

CEINGE Biotecnologie Avanzate Scarl – Via Gaetano Salvatore, 486 (già via Comunale Margherita) 80145 Napoli – Call Center 800116670 Fax +39 081 3737808 – <http://www.ceinge.unina.it>

Dipartimento Assistenziale di Medicina di Laboratorio  
Azienda Ospedaliera Universitaria  
"Università degli Studi di Napoli FEDERICO II"

CEINGE Biotecnologie Avanzate S.C.a.r.l.

Informed Consent Prenatal Diagnosis continued

### Other possible consequences of the prenatal diagnosis

- I have been informed, I understand and I accept that the analysis:
  - Can take longer than scheduled
  - May not provide useful results
- I have been made aware of all the above that I declare I understand and accept as possible complications of the entire analytic procedure.

Signature \_\_\_\_\_

- I have been informed and I accept that the procedures used for these analyses can entail the following **risks**:

### Risks of laboratory error

In all laboratory examinations there is a probability, albeit low, of a laboratory error. I have been informed that DAsMeLab-CEINGE takes all the possible precautions to prevent and avoid a laboratory error that, however, could occur, as in any human activity.

### Risks of sample loss

One of the risks of the laboratory analysis of samples from human tissues is that the sample could be lost, damaged or made useless for the analysis. I have been informed that DAsMeLab-CEINGE takes all possible precautions to prevent this eventuality. Nevertheless, I am aware that there is always a possibility that this could happen as a possible risk of this examination. In this case, I will be informed and eventually I will undergo a new sampling.

### Risk of stress and emotional damage

One of the effects of this examination is that I can suffer from stress during the execution and the completion of the analysis and while awaiting the result. Neither the institute nor the personnel in charge of the analysis can be held responsible for this effect.

Signature \_\_\_\_\_

### Information related to the prenatal diagnosis

I declare that I have received and examined the information regarding the prenatal diagnosis and I undertake to examine it in detail.

Signature \_\_\_\_\_

Dipartimento Assistenziale di Medicina di Laboratorio  
Azienda Ospedaliera Universitaria  
“Università degli Studi di Napoli FEDERICO II”

CEINGE Biotecnologie Avanzate S.C.a.r.l.

Informed Consent Prenatal Diagnosis continued

**This informed consent has been collected by Prof. / Dr.:**

Name \_\_\_\_\_ Signature \_\_\_\_\_

**In the presence of Drs.:**

Name \_\_\_\_\_ Signature \_\_\_\_\_

Name \_\_\_\_\_ Signature \_\_\_\_\_

**Additional questions asked by Ms** \_\_\_\_\_

\_\_\_\_\_

\_\_\_\_\_

\_\_\_\_\_

\_\_\_\_\_

\_\_\_\_\_

\_\_\_\_\_

\_\_\_\_\_

Signature \_\_\_\_\_

**The answers to the above-mentioned questions have been provided by Prof./Dr.:**

Name \_\_\_\_\_ Signature \_\_\_\_\_

**In the presence of Drs.:**

Name \_\_\_\_\_ Signature \_\_\_\_\_

Name \_\_\_\_\_ Signature \_\_\_\_\_

Naples, \_\_\_\_\_
